# Supplementary material
Source: publisher site journal article supplement (https://www.degruyterbrill.com/publication/isbn/9783805910958/downloadAsset/9783805910958_Inhaltsverzeichnis.pdf)
Supplement: Supplementary file 1 [file 9783805910958_Inhaltsverzeichnis.pdf]

# Inhaltsübersicht

|                                                                            | Seite <sup>*</sup> |
|----------------------------------------------------------------------------|--------------------|
| Buch 2 · Recht der Schuldverhältnisse                                      |                    |
| Abschnitt 3 · Schuldverhältnisse aus Verträgen                             |                    |
| Titel 5 · Rücktritt; Widerrufs- und Rückgaberecht bei Verbraucherverträgen |                    |
| Untertitel 1 · Rücktritt _____                                             | 1                  |
| Untertitel 2 · Widerrufs- und Rückgaberecht bei Verbraucherverträgen _____ | 327                |
| Sachregister _____                                                         | 645                |

---

<sup>\*</sup> Zitiert wird nicht nach Seiten, sondern nach Paragraph bzw Artikel und Randnummer; siehe dazu auch S VI.
